# Supplementary material for: Modulating the optical and magnetic properties of geometrically frustrated ZnV2O4 by the introduction of indium (nonmagnetic ions), iron, and chromium (magnetic ions)
Source: Royal Society of Chemistry journal article supplement (doi:10.1039/d0dt02554b), 2020-01-01
Supplement: d0dt02554b1.pdf [file d0dt02554b1.pdf]

Electronic Supplementary Information (†ESI)

**Modulating the optical and magnetic properties of geometrically frustrated  $\text{ZnV}_2\text{O}_4$  by the introduction of indium (nonmagnetic) and iron and chromium (magnetic ions)**

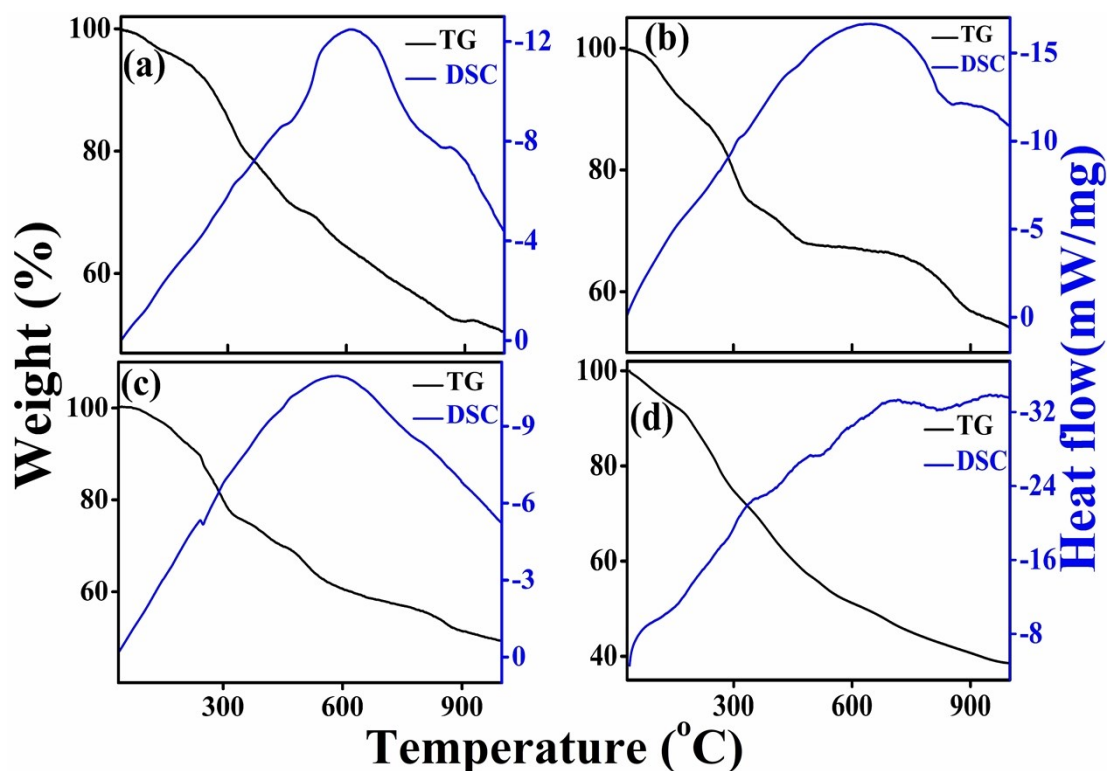

**Fig. S1** shows thermogravimetric (TG) and differential scanning calorimetric (DSC) traces of xerogels formed from the reaction of propylene oxide with chloride salts of zinc and vanadium with  $\text{In}(\text{NO}_3)_3 \cdot x\text{H}_2\text{O}$  to yield  $\text{ZnV}_{2-x}\text{In}_x\text{O}_4$  series where (a)  $x = 0.00$ , (b)  $x = 0.25$ , (c)  $x = 0.50$ , and (d)  $x = 1.00$ .

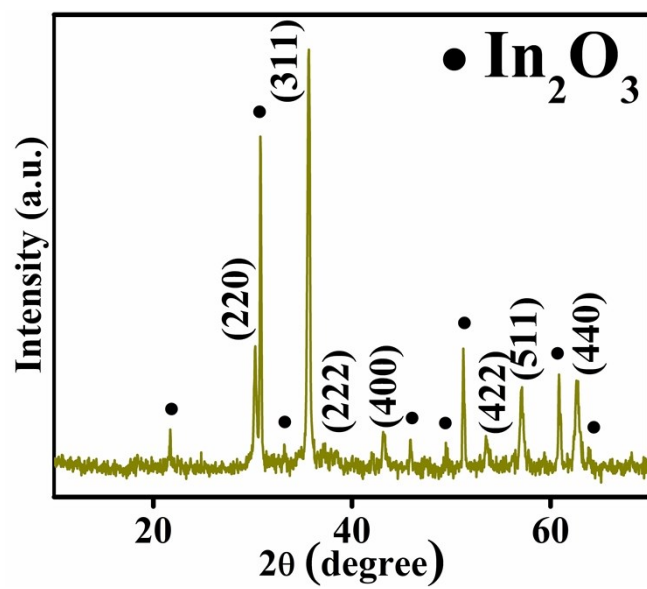

**Fig. S2** shows PXRD pattern of calcined xerogel with a composition of  $\text{ZnV}_{0.50}\text{In}_{1.50}\text{O}_4$ .

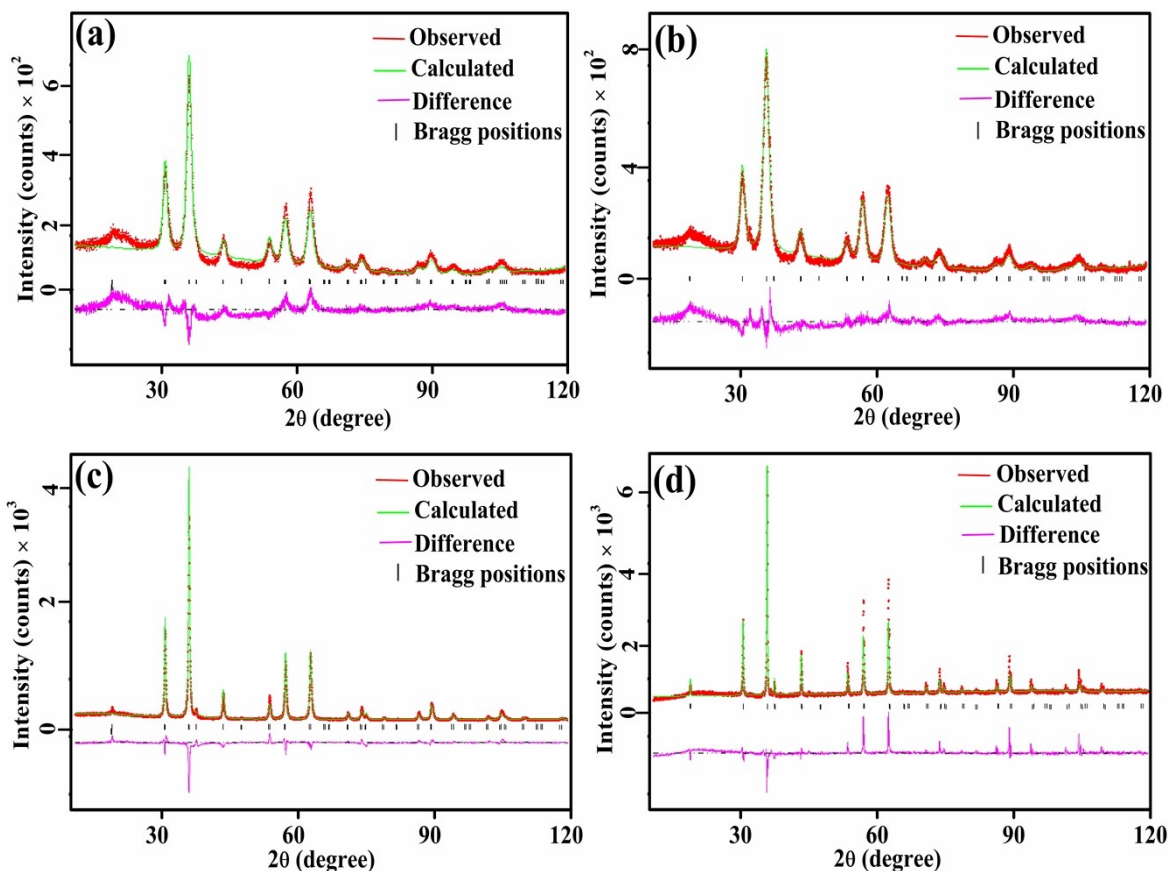

**Fig. S3** shows (a)-(c) structural refinement trials of the PXRD patterns of compositions of the series  $\text{ZnV}_{2-x}\text{In}_x\text{O}_4$  ( $x = 0.25, 0.50$ , and  $1.00$ ) by the Rietveld method considering 10 mol % of  $\text{In}^{3+}$  occupying tetrahedral sites in addition to octahedral sites, (d) structural refinement of the PXRD pattern of  $\text{ZnVFeO}_4$  in which mixed occupancy of Fe at the tetrahedral and octahedral sites is considered.

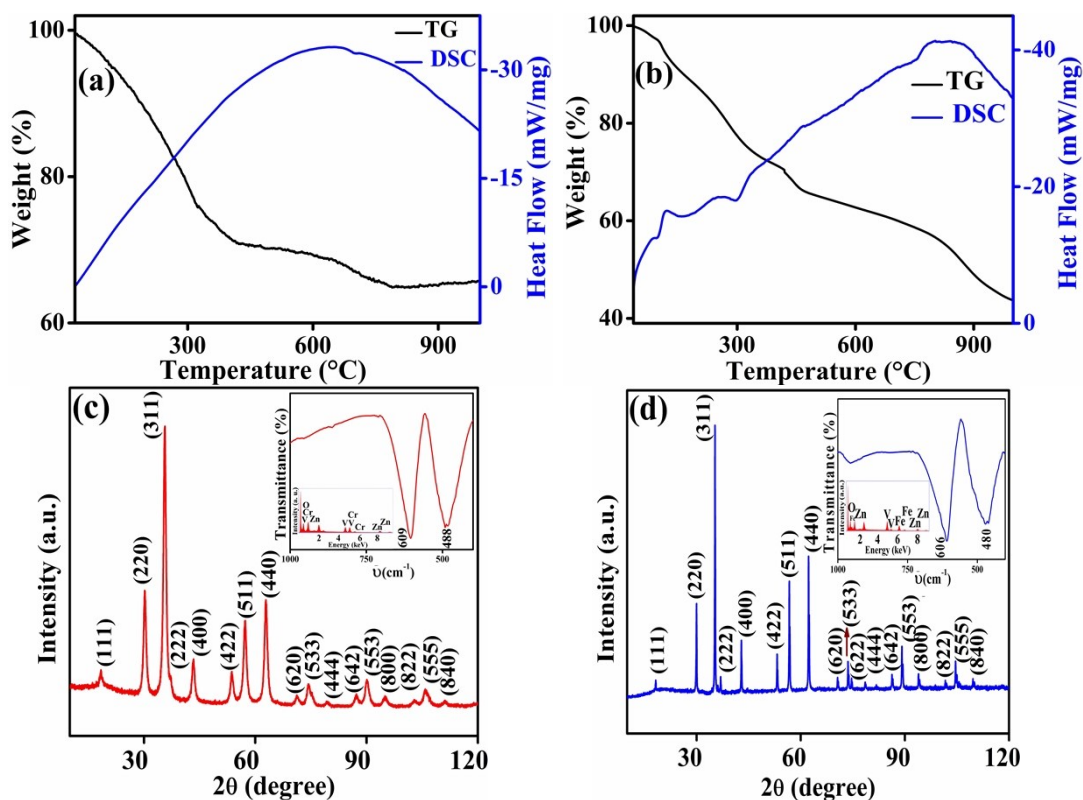

**Fig. S4** shows (a) and (b) show thermogravimetric (TG) and differential scanning calorimetric (DSC) traces of xerogels obtained from the reaction of propylene oxide with chloride salts of Zn, V and Cr (1:1:1) and chloride and nitrate salts of zinc, vanadium, and iron (1:1:1), respectively, (c) and (d) PXRD pattern obtained after calcining the xerogels containing zinc, vanadium with chromium and zinc, vanadium with iron at 700 °C and 850 °C, respectively in flowing argon atmosphere for 2 h. Insets of (c) and (d) show their respective FTIR and energy dispersive spectra.

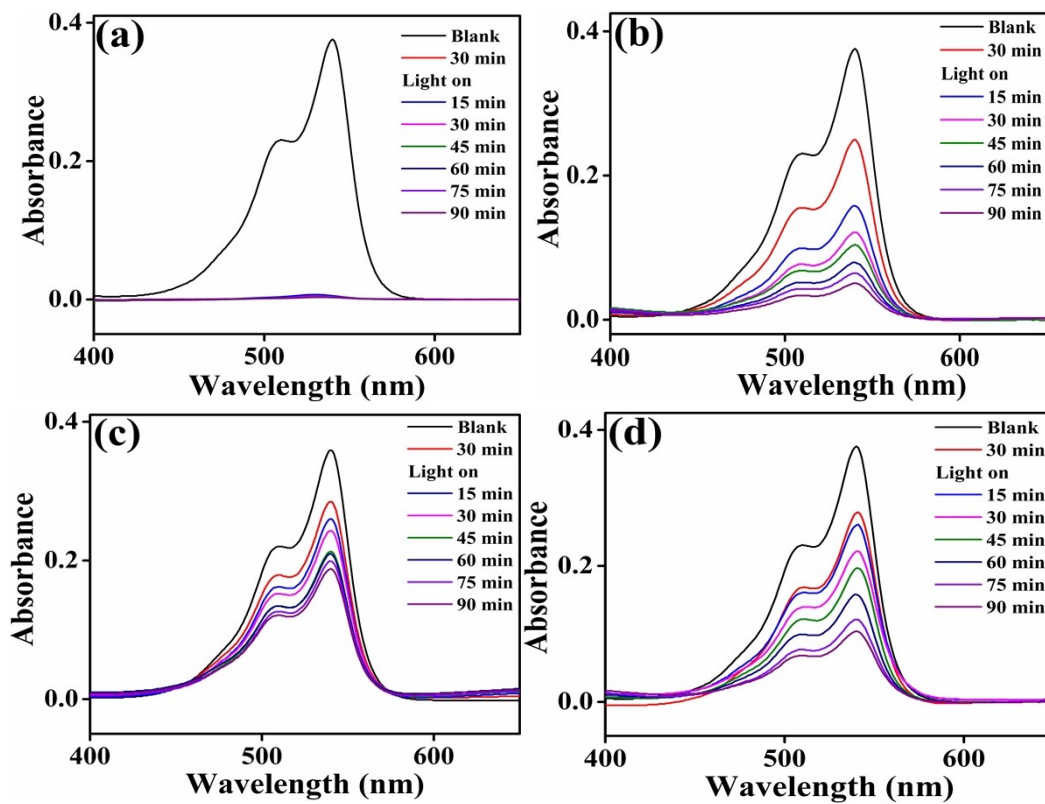

**Fig. S5** shows temporal changes of Rh-6G dye solution ( $10 \times 10^{-5}$  M) in the presence of 50 mg of (a)  $\text{ZnV}_2\text{O}_4$ , (b)  $\text{ZnVInO}_4$ , (c)  $\text{ZnVCrO}_4$ , and (d)  $\text{ZnVFeO}_4$  under UV-visible light.

**Table S1** Summary of the crystallographic details from the Rietveld refinement of PXRD patterns of ZnVCrO<sub>4</sub> and ZnVFeO<sub>4</sub>.

| Formula                          | ZnVCrO <sub>4</sub> | ZnVFeO <sub>4</sub> |
|----------------------------------|---------------------|---------------------|
| Crystal system                   | Cubic               | Cubic               |
| Space group                      | $Fd\bar{3}m$ (#227) | $Fd\bar{3}m$ (#227) |
| $a$ (Å)                          | 8.3567 (23)         | 8.40665 (7)         |
| Cell volume (Å <sup>3</sup> )    | 583.5 (5)           | 594.112 (14)        |
| Formula weight (g/mol)           | 232.12              | 235.92              |
| $Z$                              | 8                   | 8                   |
| $\rho$ calc (g/cm <sup>3</sup> ) | 5.284               | 5.275               |
| Temperature (°C)                 | 25                  | 25                  |
| No. of data points               | 11001               | 11001               |
| 2 $\theta$ range                 | 10-120°             | 10-120°             |
| $R_p$ (%)                        | 5.44                | 9.32                |
| $R_{wp}$ (%)                     | 7.46                | 11.49               |
| $\chi^2$                         | 1.178               | 1.498               |

**Table S2** Atomic parameters after the final cycle of refinement of ZnVCrO<sub>4</sub> and ZnVFeO<sub>4</sub>.

| Atoms | Wyck  | $x/a$      | $y/b$      | $z/c$      | SOF       | U(iso)Å <sup>2</sup> |
|-------|-------|------------|------------|------------|-----------|----------------------|
| V     | $16c$ | 0          | 0          | 0          | 0.517 (6) | 0.0205 (7)           |
| Cr    | $16c$ | 0          | 0          | 0          | 0.491 (6) | 0.0219 (11)          |
| Zn    | $8b$  | 0.375      | 0.375      | 0.375      | 0.983 (5) | 0.0224 (8)           |
| O     | $32e$ | 0.2438 (5) | 0.2438 (5) | 0.2438 (5) | 1.0       | 0.025                |
| V     | $16c$ | 0          | 0          | 0          | 0.526 (6) | 0.0168 (12)          |
| Fe    | $16c$ | 0          | 0          | 0          | 0.477 (5) | 0.0238 (13)          |
| Zn    | $8b$  | 0.375      | 0.375      | 0.375      | 0.996 (5) | 0.0245 (7)           |
| O     | $32e$ | 0.2493 (5) | 0.2493 (5) | 0.2493 (5) | 1.0       | 0.025                |
